# A novel deep learning method for large-scale analysis of bone marrow adiposity using UK Biobank Dixon MRI data

David M Morris<sup>1,2,#</sup>, Chengjia Wang<sup>1,3,#</sup>, Giorgos Papanastasiou<sup>2,4</sup>, Calum D Gray<sup>2</sup>, Sammy Badr<sup>5,6</sup>, Julien Paccou<sup>5,7</sup>, Scott IK Semple<sup>1,2</sup>, Tom MacGillivray<sup>8</sup>, and William P Cawthorn<sup>1\*</sup>

<sup>1</sup>University/BHF Centre for Cardiovascular Science, University of Edinburgh, The Queen's Medical Research Institute, Edinburgh BioQuarter, 47 Little France Crescent, Edinburgh, EH16 4TJ, UK. <sup>2</sup>Edinburgh Imaging, University of Edinburgh, The Queen's Medical Research Institute, Edinburgh BioQuarter, 47 Little France Crescent, Edinburgh, EH16 4TJ, UK. <sup>3</sup>School of Mathematics and Computer Sciences, Heriot-Watt University, Edinburgh, EH14 1AS, UK. <sup>4</sup>School of Computer Science and Electronic Engineering, Wivenhoe Park, The University of Essex, Colchester, CO4 3SQ, UK. <sup>5</sup>University of Lille, Marrow Adiposity and Bone Laboratory (MABlab) ULR 4490, F-59000 Lille, France. <sup>6</sup>CHU Lille, Department of Radiology and Musculoskeletal Imaging, F-59000 Lille, France. <sup>7</sup>CHU Lille, Department of Rheumatology, F-59000 Lille, France. <sup>8</sup>Centre for Clinical Brain Sciences, University of Edinburgh, The Queen's Medical Research Institute, Edinburgh BioQuarter, 47 Little France Crescent, Edinburgh, EH16 4TJ, UK.

#These authors contributed equally to this work.

**\*Correspondence to:** William Cawthorn, University/BHF Centre for Cardiovascular Science, The Queen's Medical Research Institute, Edinburgh BioQuarter, 47 Little France Crescent, Edinburgh, EH16 4TJ.

Email: [W.Cawthorn@ed.ac.uk](mailto:W.Cawthorn@ed.ac.uk)

Tel: +44(0)1312426691

Fax: +44(0)1312426779

**Short title:** Deep learning for marrow fat in the UK Biobank

**Key words:** Deep learning; Bone marrow adiposity; Magnetic resonance imaging; UK Biobank; Bone; Biomarkers

## Highlights:

- We establish a new deep learning method for image segmentation.
- Our method improves segmentation of small structures from large volumetric data.
- Using our method, we assess bone marrow fat fraction (BMFF) in UK Biobank MRI data.
- This is the first use of deep learning for large-scale, multi-site BMFF analysis.
- Our results highlight the potential of BMFF as a new clinical biomarker.

42 **ABSTRACT**

43

44 **OBJECTIVES:** Bone marrow adipose tissue (BMAT) represents >10% of total fat mass  
45 in healthy humans and further increases in diverse clinical conditions, but the impact  
46 of BMAT on human health and disease remains poorly understood. Magnetic  
47 resonance imaging (MRI) allows non-invasive measurement of the bone marrow fat  
48 fraction (BMFF), and human MRI studies have begun identifying associations between  
49 BMFF and skeletal or metabolic diseases. However, such studies have so far been  
50 limited to smaller cohorts: analysis of BMFF on a larger, population scale therefore  
51 has huge potential to reveal fundamental new knowledge of BMAT's formation and  
52 pathophysiological functions. The UK Biobank (UKBB) is undertaking whole-body MRI  
53 of 100,000 participants, providing the ideal opportunity for such advances.

54

55 **MATERIALS AND METHODS:** Herein, we developed a deep learning pipeline for  
56 high-throughput BMFF analysis of these UKBB MRI data. Automatic bone marrow  
57 segmentation was achieved by designing new lightweight attention-based 3D U-Net  
58 convolutional neural networks that allowed more-accurate segmentation of small  
59 structures from large volumetric data. Using manual segmentations from 61-64  
60 subjects, the models were trained against four bone marrow regions of interest: the  
61 spine, femoral head, total hip and femoral diaphysis. Models were validated using a  
62 further 10-12 datasets for each region and then used to segment datasets from a  
63 further 729 UKBB participants. BMFF was then determined and assessed for expected  
64 and new pathophysiological characteristics.

65

66 **RESULTS:** Dice scores confirmed the accuracy of the models, which matched or  
67 exceeded that for conventional U-Net models. The BMFF measurements from the  
68 729-subject cohort confirmed previously reported relationships between BMFF and  
69 age, sex and bone mineral density, while also identifying new site- and sex-specific  
70 BMFF characteristics.

71

72 **CONCLUSIONS:** We have established a new deep learning method for accurate  
73 segmentation of small structures from large volumetric data. This method works well  
74 for accurate, large-scale BMFF analysis from UKBB MRI data and has the potential to  
75 reveal novel clinical insights. The application of our method across the full UKBB  
76 imaging cohort will therefore allow identification of the genetic and pathophysiological  
77 factors associated with altered BMAT. Together, our findings establish the utility of  
78 deep learning for population-level BMFF analysis and promise to help elucidate the  
79 full impact of BMAT on human health and disease.

## 80 1. INTRODUCTION

81 Bone marrow adipose tissue (BMAT) accounts for up to 70% of total bone marrow  
82 (BM) volume and approximately 10% of total fat mass in lean, healthy humans (1).  
83 BMAT further increases with ageing and in diverse clinical conditions, including  
84 osteoporosis, obesity, type 2 diabetes, oestrogen deficiency, chronic kidney disease,  
85 radiotherapy and glucocorticoid treatment (1). In striking contrast to other adipose  
86 depots, BMAT also increases during caloric restriction in animals and in humans with  
87 anorexia nervosa (1-4). Thus, BMAT is a major component of normal human anatomy;  
88 is distinct to other types of adipose tissue; and is altered in numerous clinical contexts.

89 These observations suggest roles for BMAT in normal physiological function and  
90 the pathogenesis of multi-morbidities, including major ageing-associated diseases.  
91 Indeed, clinical and preclinical studies suggest that BMAT can directly influence  
92 skeletal remodelling, haematopoiesis and energy homeostasis (1, 5, 6) and have  
93 revealed endocrine properties through which BMAT may exert systemic effects (3).  
94 However, study of BMAT has been limited, especially in comparison to other major  
95 adipose depots (1); hence, BMAT formation and function remains poorly understood.

96 Despite this relative ignorance, recent studies have revealed new fundamental  
97 knowledge of BMAT biology. One key finding is that BMAT's characteristics and  
98 functions differ according to its skeletal location. BMAT is proposed to exist in two  
99 broad subtypes, dubbed 'constitutive' and 'regulated' (7, 8): constitutive BMAT  
100 predominates in the appendicular skeleton, particularly at more-distal sites, whereas  
101 regulated BMAT develops in the axial skeleton and in proximal regions of the long  
102 bones, such as the femoral head and epiphysis. Adipocytes within regulated BMAT  
103 increase or decrease in size and/or number in response to altered environmental,  
104 physiological and pathological conditions, whereas those within constitutive BMAT are  
105 relatively resistant to expansion or breakdown in such contexts (7, 8). Thus, efforts to  
106 further elucidate BMAT formation and function must consider these fundamental site-  
107 specific differences.

108 Magnetic resonance imaging (MRI) and proton MR spectroscopy have emerged  
109 as key tools for non-invasively assessing BMAT properties in humans (9), including  
110 the extent of BM adiposity and the proportions of saturated and unsaturated lipids  
111 within the BM (10). The former depends on analysis of BM fat fraction (BMFF) using  
112 chemical shift-encoding based water-fat separation methods. These approaches have  
113 been applied in various small- and mid-scale human cohort studies, revealing some  
114 insights into BMAT's association with human skeletal and metabolic health (11, 12).  
115 For example, multiple studies have shown that BMFF is increased in osteoporosis and  
116 is associated with lower bone mineral density (BMD) in non-osteoporotic subjects (11-  
117 13). However, these cohort studies have never included more than 560 people (13),  
118 limiting the ability to detect other associations. Thus, analysis of BMFF on a larger  
119 scale has enormous potential to reveal fundamental new knowledge of BMAT  
120 formation and function, including the association with other physiological, pathological  
121 and genetic variables. This would provide new understanding about the factors that  
122 regulate BMAT development, as well as highlighting how altered BMFF impacts  
123 human health and disease.

124 The UK Biobank (UKBB) is undertaking the world's largest health imaging study  
125 (14), providing an ideal opportunity for such large-scale BMFF analysis. Of the  
126 500,000 UKBB participants, 100,000 are undergoing MRI of the brain, heart and whole  
127 body, as well as dual-energy X-ray absorptiometry to measure BMD. As of August  
128 2022, approximately 53,000 participants have been scanned. Efficient measurement  
129 of BMFF from these MRI datasets will require development of new automated analysis

130 methods. Several groups have developed machine learning for automated  
131 segmentation of other anatomical regions from the UKBB MRI data (15-17). Machine  
132 learning has also recently been used to segment the knee or vertebral BM from Dixon  
133 images in smaller cohorts outwith the UKBB (18-20); however, machine learning has  
134 not yet been developed for automated segmentation of the BM from other skeletal  
135 sites, and never using MR data from the UKBB. These were the goals of the present  
136 study.

137       Given the potential insights that could be gained from such large-scale BMFF  
138 analysis, herein we developed a deep learning pipeline for automated BM  
139 segmentation from UKBB MRI data. Our findings establish the utility of deep learning  
140 for large-scale analysis of BMFF within the UKBB and the potential of this approach  
141 for revealing the impact of BMAT on human health and disease.

## 142 **2. MATERIALS AND METHODS**

### 143 **2.1. UKBB Imaging study – participants**

144 Full details of the UKBB imaging study have recently been reported by Littlejohns *et*  
145 *al*, who summarise the study as "*a population-based cohort of half a million*  
146 *participants aged 40–69 years recruited between 2006 and 2010. In 2014, UK Biobank*  
147 *started the world’s largest multi-modal imaging study, with the aim of re-inviting*  
148 *100,000 participants to undergo brain, cardiac and abdominal magnetic resonance*  
149 *imaging, dual-energy X-ray absorptiometry and carotid ultrasound*" (14). As of August  
150 2022, over 53,000 participants have undergone the UKBB imaging protocol. The  
151 phenotypic and imaging data used in this study were obtained from UKBB and  
152 analysed under an approved project application (ID 48697). All work reported herein  
153 was done in accordance with UKBB ethical requirements.

154

### 155 **2.2. UKBB – MRI acquisition**

156 MRI data were acquired on a 1.5 T whole-body MR system (Magnetom Aera, Siemens  
157 Medical Solutions, Erlangen, Germany). Tridimensional two-point Dixon sequences  
158 were used to give coverage from neck to knees, consisting of six volumes. In the  
159 present study we analysed three of these volumes: the abdomen, hips, and upper leg.  
160 For the abdomen and hips, breath-hold sequences were acquired by using a 3D dual-  
161 echo spoiled gradient-echo (FLASH) T1-weighted acquisition using the following  
162 parameters: TR/TE<sub>in-phase</sub>/TE<sub>out-of-phase</sub>: 6.7/4.8/2.4 ms; field of view (FOV): 500 x 381  
163 mm; slice thickness: 4.5 mm; isotropic in-plane spatial resolution of 2.2 mm; number  
164 of slices: 44. Parallel imaging factor 2 in both frequency/phase directions and a partial  
165 Fourier reconstruction of 71% were used to reduce acquisition time. For the upper leg  
166 slice, slice thickness was reduced to 3.5 mm and 72 slices were acquired with the  
167 same resolution. Detailed technical parameters are available in the UKBB rationale  
168 (14).

169

### 170 **2.3. UKBB – DXA scans for bone mineral density measurement and body** 171 **composition**

172 As part of the UKBB Imaging study, bone mineral density (BMD) was measured at the  
173 lumbar spine (L1–L4) and at the non-dominant hip for femoral neck and total hip by  
174 DXA scan (GE-Lunar iDXA). Machines were calibrated daily, and quality-assurance  
175 tests were carried out periodically. WHO criteria were used to define osteoporosis  
176 (BMD T-score  $\leq -2.5$ ) and osteopenia (BMD T-score between  $-1.0$  and  $-2.5$ ). All  
177 UKBB imaging participants also underwent total-body DXA scanning (GE-Lunar  
178 iDXA). Fat, lean, and bone masses for the total body and per region (arms, legs, and  
179 trunk) were measured and analyzed using the manufacturer’s validated software, with  
180 visceral adipose tissue (VAT, kg) also measured. Daily quality-control and calibration  
181 procedures were performed using the manufacturer’s standards.

182

### 183 **2.4. Training and validation cohort**

184 To develop a deep learning method for automated BM segmentation we focussed on  
185 a subset of UKBB Imaging participants, consisting of 729 male and female subjects  
186 aged 60-69 years old (Table 1). This cohort was selected to include control subjects  
187 (with normal BMD) and subjects with osteopaenia or osteoporosis. Subjects with  
188 obesity and type 2 diabetes were excluded because these conditions can influence  
189 BMFF (1, 6), leaving only non-diabetic subjects with a body mass index (BMI) within  
190 the normal range (18.5-25 kg/m<sup>2</sup>).

191

## 192 **2.5. Data management and workflow**

193 MRI data was downloaded from UKBB, consisting of multiple volumes acquired using  
194 the 2-point Dixon technique, based on the parameters listed above. For each volume  
195 the in- and out-of-phase, fat and water images were available. The data were  
196 downloaded in flat format and sorted by sequence to expedite data access. The  
197 volumes required were identified by their sequence number assuming a standard  
198 acquisition protocol, which was determined from the data. As shown in Figure 1, we  
199 began by downloading and analysing data from the 729-subject training and validation  
200 cohort.

## 201 **2.6. Manual segmentation of MRI data**

202 A training dataset of 75 subjects (Fig. 1A) was extracted from the test dataset to be  
203 used for the training and validation of the deep learning algorithms. Each of these 75  
204 datasets was segmented by a single observer for consistency, generating manual  
205 segmentations. For each subject, the fat images were used to define four distinct  
206 volumes of interest (VOIs) corresponding to BM regions of pathophysiological  
207 relevance: the spine, the femoral head, the total hip, and the femoral diaphysis. The  
208 spine consisted of all the vertebral marrow in the principle abdominal volume, which  
209 contained 6-7 vertebrae ranging from T8 to L3. The reason for this range of vertebrae  
210 is that the multiple abdominal acquisitions have a fixed volume and are continuous  
211 across the patient's body; hence, the range of vertebrae within each abdominal volume  
212 depends on the patient's height. The femoral head and total hip regions were  
213 segmented from the hip volume. Here, the total hip consisted of the femoral neck and  
214 the hip between the lesser and greater trochanter. The femoral diaphysis, located in  
215 the upper leg volume, was segmented at the mid-shaft of the femur, which was  
216 identified by locating the point of the shaft with the narrowest cross section. Each  
217 femoral volume was segmented from the non-dominant left femur to allow more-direct  
218 comparison with DXA measurements, which are usually performed at the non-  
219 dominant hip. Femoral BMFF does not show significant contralateral differences (21),  
220 meaning that BMFF measurements from the left femur should be representative of  
221 both sides. Segmentation was performed on the native axial images on a slice-by-slice  
222 basis in Analyze 12.0 software (AnalyzeDirect, Overland Park, KS, USA) following an  
223 overall inspection of each volume to determine the extent of each region excluding  
224 partial volume, defined as a drop in signal intensity > 50% compared to the centre of  
225 the region.

226  
227 Of the 75 manually segmented datasets (Fig. 1A), 64 were used to train the deep  
228 learning model for the spine; 61 were used for the femoral head and diaphysis; and  
229 62 were used for the total hip (Fig. 1B). To do so, the fat images and their  
230 corresponding manual segmentations were used iteratively to build a separate model  
231 to segment each region individually and generate a deep learning segmentation (Fig.  
232 1D). The remaining datasets (Fig. 1C) were not used in training the models but instead  
233 were used as unseen validation data to test the models: 12 datasets were used for  
234 testing the spine, 11 for the femoral head, and 10 each for the total hip and diaphysis  
235 models. For these validation datasets, comparison of the deep learning segmentations  
236 with the manual segmentations (Fig. 1E) allowed dice coefficients to be calculated for  
237 the four different algorithms (Table 2).

238  
239 All the deep learning segmentations for the training and validation datasets were  
240 manually checked. This identified several data issues and segmentation failures that  
241

242 required the development of specific error-checking rules. These rules were based on  
243 determining if the VOIs generated were physiologically appropriate: VOIs could not  
244 consist only of single voxels, nor were gaps allowed within the VOIs. Therefore, the  
245 initial error-checking steps automatically removed any single-voxel VOIs and joined  
246 together any discontinuous VOIs. Additional error checking was used to identify those  
247 segmentations that were outliers within the distribution of regions generated. This was  
248 based on the centre of mass being greater than 3 standard deviations from the mean  
249 of the training dataset. This is useful for identifying erroneous segmentations that have  
250 been caused by data quality issues or deviations from the standard MRI protocol.

251

## 252 **2.7. U-Net design and rationale**

253 Directly segmenting 3D data using a traditional U-Net (22) has several drawbacks: i),  
254 the size of input data and the depth of the model are limited by the available GPU  
255 memory; ii), due to the highly imbalanced distribution between classes, the traditional  
256 3D U-Net (22) tends to label all voxels as background; and iii), the fixed size of the  
257 receptive field limited the ability of the model to effectively utilize the global correlations  
258 between local features.

259

260 To address these issues, we developed a novel light-weight attention-based U-Net  
261 model for simultaneous detection and segmentation of tiny structures in large 3D data.  
262 Figure 2 shows the architecture of this new Attention ROI U-Net model. The encoding  
263 subnetwork output feature maps four resolution levels (23). Each encoding block  
264 consists of a conventional U-Net convolutional layer (3D conv + Relu + Instance  
265 normalization), a convolutional layer equipped with a modified convolutional block  
266 attention module (CBAM) (24), and a down-sampling layer implemented as a stride 2  
267 3X3X3 convolution operation. The last encoding block consists of two CBAM  
268 convolutional layers with a non-local spatial attention layer (25) inserted between  
269 them. Unlike the original CBAM, which generates two attention maps using average  
270 and max pooling, we used 1X1X1 convolution to generate one single fixed-size  
271 attention map from each CBAM layer. The 5 attention maps are all resized to  
272 96X96X96 and then fused by a mini convolutional neural network (CNN) with a  
273 *Softmax* layer to generate a probability map  $\mathbf{P}$ . The centre,  $(x, y, z)_{ROI}$ , of a region of  
274 interest (ROI), which indicates the location of the segmented anatomical structure, is  
275 then given by:

$$276 \quad (x, y, z)_{ROI} = \mathbf{P} \odot (\mathbf{u}, \mathbf{v}, \mathbf{w}),$$

277 Here,  $\mathbf{u}, \mathbf{v}, \mathbf{w}$  are grid of data coordinates normalized to [-1, 1]. With this centre, a cubic  
278 ROI is extracted from the encoder feature maps of all resolution levels with sizes 32,  
279 16, 8 and 4. The U-Net decoder then generates the segmentation of this ROI. The  
280 final segmentation results are produced by recovering the ROI location within the  
281 original data volume.

282

283 Detection of the ROI location is realised by minimizing a ROI centre localization loss,  
284  $L_{loc}$ , defined on the predicted and ground-truth ROI centres. We use the conventional  
285 Dice loss,  $L_{ROI}$ , to optimize the segmentation of the detected ROI. Because minimize  
286 bias in traduced by the class imbalance on the final segmentation results, we also  
287 compute a weighted Dice loss,  $L_{seg}$ , using the full image segmentation, where the  
288 weight of each class is defined as the reciprocal of the number of voxels. To sum up,  
289 the loss function for trains ing our new U-Net model is defined as:

$$290 \quad L = L_{seg} + \lambda_1 L_{ROI} + \lambda_2 L_{loc},$$

291 where  $\lambda_1$  and  $\lambda_2$  control the weights between different losses. In this work, we set  
292  $\lambda_1 = \lambda_2 = 1$ . The proposed algorithm was implemented in Pytorch (26) with an Adam  
293 optimizer (27).

294

## 295 **2.8. Fat fraction mapping**

296 Fat fraction (FF) measurements from MRI data allow for the determination of the  
297 relative quantities of water and fat present within tissue, based on the different  
298 resonant frequencies of hydrogen atoms bound to fat and water. Acquisition of in- and  
299 out-of-phase images allows fat and water images to be generated. Based on the  
300 intensities of these images the FF was calculated as a percent of the voxel volume.  
301 This was done for all volumes of interest. The specific VOIs, segmented using our  
302 novel U-Net model, were then applied to the FF maps to allow extraction of the FF for  
303 each VOI. This used the fat and water images for each volume of interest and nearest-  
304 neighbour smoothing was applied to the images before the maps were calculated to  
305 minimise the influence of any noise spikes in the data. In house code (Matlab 2019B,  
306 The Mathworks Inc, Natick, Massachusetts, USA) applied the deep learning  
307 segmentations to the FF maps after erosion of the spine, head and total hip regions  
308 by a single boundary voxel in plane to ensure measurements were from marrow and  
309 not bone. This erosion step was not applied to the diaphysis segmentations because  
310 of the small cross section of this region (for some patients the diaphyseal cross section  
311 is so small that it would be eliminated by the erosion step).

312

## 313 **2.9. Data presentation and statistical analysis**

314 Data were analysed for normal distribution using the Anderson-Darling test. For results  
315 tables of summary statistics, normally distributed data are reported as mean  $\pm$  SEM  
316 and were compared using one-way or two-way ANOVA with Šídák's test for multiple  
317 comparisons. Non-normally distributed data are reported as median [interquartile  
318 range] and were compared using the Kruskal-Wallis test, with Dunn's test for multiple  
319 comparisons; the latter was also used when comparing normally distributed data with  
320 non-normally distributed data. Images of manual and deep learning segmentations  
321 were generated using 3DSlicer (v4.11) and colours adjusted using GIMP2. Graphs of  
322 summary data are presented as Violin plots overlaid with individual data points.  
323 Visualisation and statistical analysis of these summary data were done using Prism  
324 software (v9.4.1, GraphPad, USA). Univariable regression analyses were done in  
325 RStudio v2022.02.1 (Build 461), with multivariable regression performed using finalfit  
326 (R package v1.0.5) (28). Subjects with any erroneous measurements (e.g. a BMD of  
327 0 g/cm<sup>2</sup>) were excluded from the regression analyses. A Bonferroni-adjusted *P*-value  
328 <0.05 was considered statistically significant.

329

## 330 **2.10. Data and code availability**

331 All data for FF and segmentation volumes will be uploaded to the UKBB. Code for the  
332 deep learning models will be made available via GitHub. Code for regression analyses  
333 will be made available via DataShare (<https://datashare.ed.ac.uk>). Until these data are  
334 publicly available, the authors will agree to all reasonable requests for code and data  
335 sharing, in accordance with UKBB guidelines.

336



### 337 **3. RESULTS**

#### 338 **3.1. U-Net development and training**

339 We first used MRI data from 61-64 subjects for manual segmentation of four VOIs: the  
340 spine, consisting of lumbar and thoracic vertebrae; the femoral head; total hip; and  
341 femoral diaphysis. We then trained separate U-Net models for each VOI and tested  
342 their performance on 10-12 subjects in a validation dataset (Fig. 1). Figure 2 shows  
343 the architecture of our new U-Net, while Table 2 shows the comparison Dice index  
344 results between the conventional U-Net and our new U-Net models for each site.  
345 Visual comparison of manual vs deep learning segmentations further confirmed the  
346 accuracy of the outputs from each of our deep learning models (Fig. 3).

#### 347 **3.2. Segmentation and Fat Fraction mapping of training and validation cohort**

349 To test if our U-Net models yield reliable BMFF results, we next applied them to FF  
350 maps from a cohort of 729 UKBB participants (Table 1). This cohort was chosen to  
351 include both males and females aged 60-69, comprising individuals with osteoporosis,  
352 osteopaenia, or normal BMD. The rationale for this is as follows: first, BMFF increases  
353 with age and, for humans aged 60-69, vertebral BMFF is expected to be greater in  
354 females than in males (29, 30); second, BMFF is increased in osteoporosis and  
355 negatively associated with BMD (1, 6, 12); and finally, BMFF is greater in the femur  
356 than in the lumbar spine (1, 31). Thus, applying our U-Net models to analyse spinal  
357 and femoral BMFF in this cohort allowed us to test if the resulting deep learning  
358 segmentations yield BMFF values that show these expected associations with sex,  
359 age, BMD, and anatomical site. If so, this would validate the accuracy of our new  
360 models for high-throughput BM segmentation and BMFF analysis.

361  
362 As shown in Figure 4, we found that BMFF in healthy control subjects significantly  
363 differed across the five regions analysed. This was most obvious for the spine, where  
364 BMFF was lower than in each femoral region. However, BMFF also differed between  
365 each femoral region, being highest in the femoral head and then decreasing  
366 progressively in the total hip ( $P = 0.0012$  vs femoral head) and diaphysis ( $P < 0.0001$   
367 vs femoral head or total hip). There were also significant, region-dependent sex  
368 differences: spinal BMFF was greater in females than in males, whereas males had  
369 greater BMFF at each femoral site (Fig. 4).

370  
371 To further understand the regional and sex differences in BMFF, we investigated if  
372 BMFF at one site is associated with BMFF at the other sites. As shown in Table 3,  
373 there were strong positive associations between BMFF at each femoral site, with the  
374 relationship between total hip BMFF and diaphyseal BMFF being stronger in males  
375 than in females. Spinal BMFF was not associated with diaphyseal BMFF; however, it  
376 was positively associated with femoral head BMFF in females, and with total hip BMFF  
377 in males and females; the latter relationship was also stronger in females than in males  
378 (Table 3). Thus, BMFF at one site is generally positively associated with BMFF at other  
379 sites, and this relationship differs between the sexes.

#### 380 **3.3. Effect of osteopaenia or osteoporosis on BMFF at each site**

382 We next investigated the effect of osteopaenia or osteoporosis on BMFF at each site.  
383 As shown in Figure 5, osteopaenic or osteoporotic females had higher BMFF than  
384 control females at each site analysed. In males, osteopaenia was associated with  
385 significantly increased BMFF at the total hip and femoral diaphysis, and total hip BMFF  
386 was also greater osteoporotic vs control males (Fig. 5). However, unlike in females,

387 BMFF at the spine or femoral head did not differ between normal, osteopaenic and  
388 osteoporotic males, while diaphyseal BMFF also did not differ between osteoporotic  
389 and normal males (Fig. 5).  
390

### 391 **3.4. Univariable associations between BMD, BMFF and other traits.**

392 The lack of increased BMFF in osteoporotic males was unexpected and may result  
393 from the low numbers in this group (Table 1). Thus, we next used univariable  
394 regression to determine if BMFF shows the expected inverse association with BMD at  
395 each site, regardless of osteoporotic status. We also investigated which other  
396 variables are associated with BMD at each site. As shown in Supplemental Table 1,  
397 BMD and BMFF were inversely associated at the spine and this relationship did not  
398 differ between the sexes. A similar relationship existed between spine BMD and legs  
399 fat %. In contrast, spine BMD was positively associated with visceral adipose tissue  
400 (VAT) mass, android fat %, trunk fat % and BMI, with the latter relationship being  
401 stronger in males than in females. There was no significant relationship between spine  
402 BMD and age, total fat % or gynoid fat %; however, females showed a trend for lower  
403 spine BMD with increasing age.  
404

405 Univariable regression analyses for BMD at the femoral neck, total hip and femoral  
406 shaft are presented in Supplemental Tables 2, 3 and 4, respectively. For femoral neck  
407 BMD we detected robust inverse associations with BMFF at the femoral head, total  
408 hip and spine; the latter relationship was assessed to determine if spinal BMFF is a  
409 useful predictor of BMD at the femoral neck, given the clinical significance of fractures  
410 at this site. Notably, the relationship with femoral head BMFF showed strong sexual  
411 dimorphism, occurring robustly in females while being absent in males. Femoral neck  
412 BMD also showed an inverse relationship also with legs fat % and a positive  
413 association with BMI; however, no significant associations occurred for the other  
414 explanatory variables tested (Supplemental Table 2).  
415

416 Similar relationships occurred for total hip BMD, including sex differences in the  
417 association with femoral head BMFF; an inverse association with legs fat %; and a  
418 positive association with BMI (Supplemental Table 3). Unlike for femoral neck BMD,  
419 total hip BMD also showed a positive association with VAT mass.  
420

421 As for these other sites, femoral shaft BMD was inversely associated with BMFF at  
422 the femoral diaphysis while being positively associated with BMI. Weaker negative and  
423 positive associations were noted for legs fat % and VAT mass, respectively, and none  
424 of these relationships differed between the sexes (Supplemental Table 4).  
425

### 426 **3.5. Univariable associations between BMFF and age, BMI or adiposity traits.**

427 In addition to BMD, factors including age, BMI and peripheral adiposity have been  
428 associated with altered BMFF. Thus, an important question is whether such other  
429 factors confound the relationships between BMFF and BMD. To address this, we first  
430 used univariable linear regression to identify other variables significantly associated  
431 with BMFF at each site, thereby identifying factors associated with BMFF and/or BMD.  
432 The results are presented in Supplemental Table 5.  
433

434 We found that spinal BMFF was positively associated with age, VAT mass, total fat %,   
435 android fat %, gynoid fat % and trunk fat % in males and females, with no sex

436 differences in these relationships. In contrast, spinal BMFF showed a positive  
437 association with legs fat % in males only (Supplemental Table 5).

438  
439 Fewer variables were associated with BMFF at the femoral head or total hip. The  
440 former showed a positive relationship only with age, and in females only, while the  
441 latter was negatively associated only with BMI across both sexes. However, no other  
442 variables were associated with BMFF at these two sites (Supplemental Table 5). In  
443 contrast, diaphyseal BMFF was associated with several of the variables assessed,  
444 often in a sexually dimorphic manner. Thus, across both sexes, diaphyseal BMFF was  
445 inversely associated with VAT mass, while inverse associations with total fat %,   
446 android fat % and trunk fat % showed significant sex differences, occurring in females  
447 but not in males. In contrast, in males, but not females, diaphyseal BMFF was  
448 positively associated with legs fat % (Supplemental Table 5).

### 449 450 **3.6. The inverse association between BMFF and BMD at each site persists after** 451 **controlling for relevant covariables.**

452 Based on the univariable associations identified in Supplemental Tables 1-5, we next  
453 constructed multivariable models to estimate the true relationship between BMFF and  
454 BMD at each site. Table 4 shows the results for BMD spine as the dependent variable.  
455 Here, the best predictive model was obtained when including BMFF Spine, sex, BMI,  
456 Legs fat %, VAT mass and Android fat % as covariables (Model 4.6). Notably, the  
457 inverse association between spinal BMFF and spinal BMD persisted even when  
458 accounting for these other covariables. Moreover, inclusion of leg fat, VAT mass and  
459 android fat weakened the size of the sex effect, suggesting that increased spinal BMD  
460 in males is explained, at least in part, by their lower amount of leg fat and greater VAT  
461 mass and android fat.

462  
463 Table 5 shows the results for femoral neck BMD as the dependent variable. Here,  
464 separate models were tested for BMFF at the femoral head, total hip or spine as the  
465 main explanatory variables; the former was assessed in females only because of the  
466 lack of relationship between femoral head BMFF and femoral neck BMD in males  
467 (Supplemental Table 2). We found that, in females, the significant inverse association  
468 between BMFF femoral head and femoral neck BMD persisted when accounting for  
469 BMI and legs fat % (Model 5.3). Similarly, across both sexes, total hip or spine BMFF  
470 retained their inverse relationships with femoral neck BMD even after accounting for  
471 sex, BMI and legs fat % (Models 5.6 and 5.11). The best model for BMFF total hip also  
472 included Android fat % and Trunk fat % (Model 5.8). Notably, male sex was no longer  
473 associated with increased femoral neck BMD when controlling for BMFF spine, BMI  
474 and legs fat % (Model 5.11), suggesting that males have greater BMD at the femoral  
475 neck because they tend to have lower spinal BMFF, lower % leg fat and higher BMI  
476 than females.

477  
478 Given that spine BMFF is positively associated with total hip BMFF (Table 3), we  
479 postulated that the inverse relationship between spine BMFF and femoral neck BMD  
480 may occur because spine BMFF is a surrogate for total hip BMFF. However, the  
481 inverse relationship between spine BMFF and femoral neck BMD persisted even when  
482 accounting for BMFF at the total hip (Model 5.12), demonstrating that these  
483 explanatory variables are acting at least partly independently of each other.

484

485 Multivariable regression for total hip BMD is presented in Table 6. The best predictive  
486 model included BMFF total hip, sex, BMI and legs fat % as the covariables (Model  
487 6.3); inclusion of VAT mass (Model 6.4) did not further improve the model, despite  
488 VAT mass showing a significant univariable association with total hip BMD  
489 (Supplemental Table 3). Notably, the inverse relationship between total hip BMD and  
490 BMFF persisted even when accounting for sex, BMI and legs fat %, confirming total  
491 hip BMFF as an independent predictor of BMD at this site.

492

493 Finally, Table 7 shows the results of multivariable regression for femoral shaft BMD.  
494 Here, the best predictive model included diaphyseal BMFF, sex, BMI, legs fat % and  
495 android fat % (Model 7.5), although a similarly accurate model was obtained when  
496 VAT mass and trunk fat % were also included (Model 7.7). As for the other BMFF-  
497 BMD relationships, BMFF at the diaphysis retained its significant inverse association  
498 with femoral shaft BMD even when these other covariables were accounted for.  
499 Moreover, males no longer had significant increases in femoral shaft BMD when  
500 controlling for BMFF diaphysis, BMI and legs fat % (Model 7.3-7.7). This suggests that  
501 males may have greater femoral shaft BMD because they have a higher BMI and lower  
502 % leg fat than females.

## 503 4. DISCUSSION

504 Herein, we have developed a new deep learning method for analysis of BM adiposity  
505 using Dixon MRI data from the UKBB. This is the first study to establish deep learning  
506 for BM segmentation at multiple sites, and the first do so, for any skeletal site, in the  
507 UKBB imaging study. Our models yield BMFF measurements that are consistent with  
508 previous observations, including sex differences in spinal BMFF and inverse  
509 associations with BMD. This demonstrates the ability of our models to generate  
510 accurate, reliable BMFF measurements from the UKBB MRI data. We further reveal  
511 new site- and sex-specific associations that have not been reported previously,  
512 highlighting the potential of our methods to uncover new pathophysiological functions  
513 of BMAT.

514

### 515 4.1. Deep learning for large-scale BM analysis

516 Several other recent studies have developed deep learning for automated BM  
517 segmentation from MRI data. For example, von Brandis *et al* assessed the feasibility  
518 of deep learning for segmenting BM from T2-weighted Dixon water-only images,  
519 focusing on the knee region (20); however, the best median dice score of their model  
520 was only 0.68, far below that obtained by our models (Table 2). Better accuracy was  
521 achieved by Zhou *et al*, who established a deep learning model for segmenting lumbar  
522 vertebrae from Dixon MRI data (18). They trained their model using manual  
523 segmentations of 165 vertebrae from 31 subjects, with the model then tested on a  
524 validation set of 24 subjects. They achieved an average dice score of 0.849, below the  
525 accuracy of our vertebral ROI-Attention-U-Net (Table 2). More recently, Zhao *et al*  
526 used deep learning for segmenting lumbar vertebrae from modified Dixon MRI data,  
527 using a training set of 142 subjects and a validation set of 64 subjects (19). Their model  
528 achieved a mean dice score of 0.912, the same as that obtained by our vertebral ROI-  
529 Attention-U-Net (Table 2). Thus, among deep learning models for segmenting  
530 vertebral BM, our model achieves an accuracy that is similar or greater than that  
531 obtained by others.

532

533 Notably, our study is the first to develop deep learning for BM segmentation at the  
534 femoral head, total hip and femoral diaphysis. This is important because the properties  
535 of BMAT vary according to skeletal location (1, 7, 8). Thus, to fully understand the  
536 health implications of BMAT and its potential utility as a clinical biomarker, it is critical  
537 to assess BMFF at other sites. Indeed, as discussed below, we found that the  
538 associations between BMFF, age, BMD, BMI and peripheral adiposity differ according  
539 to the BM region assessed, underscoring the importance of assessing BMFF across  
540 multiple sites. Finally, our model includes dedicated error-checking steps to remove  
541 inaccurate segmentation outputs, which is essential for reliable analysis of large-scale  
542 MRI data.

543

### 544 4.2. New ROI attention U-Net model

545 Another advance of the present study is our development of a new ROI attention U-  
546 Net model that allows accurate segmentation of small VOIs from large volumetric data.  
547 The traditional 3D U-Net has a fixed receptive field that is dependent on the size of  
548 convolutional kernels and network depth. To achieve state-of-the-art performance, the  
549 network architecture needs to be carefully designed to fit the sizes of the segmented  
550 objects and image resolution. As a result, in this study the traditional 3D U-Net  
551 generates highly accurate results for vertebrae and femoral head (Table 2), regions in  
552 which the segmented objects are relatively large. However, this traditional U-Net

553 shows limited discriminative power when dealing with smaller structures such as the  
554 femoral diaphysis, where only a few pixels on each axial slice are annotated as  
555 foreground. On the contrary, our new ROI attention U-Net model can adaptively  
556 encode the local and global contextual information with its adjustive-attention  
557 mechanism. As shown in Table 2, it increased segmentation accuracy of the femoral  
558 diaphysis by over 25% and also slightly improved accuracy for the total hip region.  
559 Alongside these improvements, for the femoral head and vertebrae the ROI attention  
560 U-Net performs similarly to the carefully designed traditional 3D U-Net (Table 2). Thus,  
561 our new ROI attention model advances the state of the art by achieving accurate  
562 segmentation of both larger and smaller objects.

#### 563 564 **4.3. Association between BMFF and pathophysiological characteristics –** 565 **confirmation of previous studies and new findings**

566 The key aim of our study was to develop and validate deep learning models for  
567 automated BM segmentation of UKBB Dixon MRI data. Our group of 729 subjects is  
568 the largest cohort yet to undergo measurement of spinal BMFF, and by far the largest  
569 to include assessment of BMFF at any femoral site (12). Consistent with previous  
570 reports, we find that spinal BMFF is lower than femoral BMFF (Fig. 4) (1, 12, 31); is  
571 greater in females than in males (Fig. 4) (29, 30); increases with age (Supplemental  
572 Table 5) (12, 29, 30, 32); is elevated in osteopaenia or osteoporosis, at least in females  
573 (Fig. 5) (1, 6, 12); exhibits a robust, inverse association with spinal BMD (Table 4) (1,  
574 6, 12); and is positively associated with visceral adiposity (Supplemental Table 5) (32,  
575 33).

576  
577 Our results for femoral BMFF are also consistent with previous studies. For example,  
578 in a cohort of aged females, Griffith *et al* found that BMFF in the femoral head, neck  
579 and diaphysis is increased in osteoporosis and inversely associated with BMD at each  
580 site (34). We confirm these findings (Fig. 5, Tables 5-7) and further reveal that femoral  
581 head BMFF is not associated with BMD at the femoral neck or total hip in males  
582 (Supplemental Tables 2-3). We also show that diaphyseal BMFF is typically inversely  
583 associated with peripheral adiposity in females but not in males, while BMFF at the  
584 femoral head or total hip is not associated with these peripheral adiposity traits  
585 (Supplemental Table 5); these observations confirm and extend those of a previous  
586 smaller-scale study (35). The reasons for these variable site- and sex-dependent  
587 relationships between BMFF and peripheral adiposity remain to be determined;  
588 however, one possibility is that they reflect preferences for the partitioning of lipid  
589 storage between different adipose depots.

590  
591 Many of our new findings relate to the fact that most previous MR-based studies of  
592 BM adiposity have focussed on vertebrae, with femoral sites being relatively  
593 overlooked (12). For example, we show that, across both sexes, BMFF is highest in  
594 the femoral head and decreases progressively in the total hip and diaphysis, while  
595 BMFF at each femoral site is greater in males than in females (Fig. 4). Unlike in the  
596 spine, age is associated with increased femoral head BMFF only in females, and  
597 across both sexes shows no relationship with total hip or diaphyseal BMFF  
598 (Supplemental Table 5). This could reflect the fact that, compared to the spine, these  
599 femoral sites contain a greater proportion of constitutive BMAT, which is less age  
600 responsive than the regulated BMAT that predominates in the axial skeleton (7, 8).  
601 However, it may be that age-related increases in femoral BMAT occur over a longer

602 timeframe that would only be apparent when BMFF is assessed over a greater age  
603 range.

604

605 Regarding constitutive vs regulated subtypes, we also find robust positive associations  
606 between BMFF at the four different sites analysed (Table 3), similar to the findings of  
607 Slade *et al* (31). However, we further reveal that these relationships exhibit sex  
608 differences and are strongest between the three femoral regions, with spinal BMFF  
609 showing no association with diaphyseal BMFF (Table 3). This may reflect differences  
610 in the development and function of regulated vs constitutive BMAT (7, 8).

611

612 Together, our present findings confirm those of previous studies while also revealing  
613 new knowledge about BMAT's site- and sex-dependent characteristics. This  
614 underscores the ability of our deep learning models to yield reliable BMFF  
615 measurements and to identify new insights into the pathophysiology of BMAT.

616

#### 617 **4.4. Limitations**

618 One specific limitation is that our cohort included relatively few osteoporotic males.  
619 This restricted our ability, in males, to detect significant effects of osteoporosis on  
620 BMFF at each site. Our univariable and multivariable regression analyses were still  
621 able to detect significant inverse associations between BMFF and BMD at each site;  
622 however, once we have measured BMFF across the full available UKBB cohort it will  
623 be informative to reassess the relationship between BMFF and osteoporosis.

624

625 A more-general limitation relates to the UKBB MRI protocol. Participants in the UKBB  
626 imaging study visited several different imaging centres for acquisition of the MRI  
627 scans. Therefore, across these different imaging centres the MRI protocol parameters  
628 had to be standardised and harmonised, resulting in both advantages and drawbacks.  
629 For example, to simplify the procedure the Dixon sequences were based on only two  
630 echo times; however, with only dual-echo sequences, no accurate T2\*-correction  
631 could be applied and the complexity of the fat spectrum could not be considered in the  
632 BMFF mapping (10, 14). As a result, reported BMFF measurements can be affected  
633 by T2\* decay effects caused by the presence of trabecular bone, which in turn may  
634 differ in the water and fat components (9, 10). However, the moderately low flip angle  
635 (10°) is acceptable to limit T1-bias, and protocol standardisation compelled all  
636 examinations to be performed in similar conditions, with the exact same parameters  
637 (9, 36). Consequently, even if the true proton-density fat fraction (PDFF) could not be  
638 quantified, a comparable estimate could be obtained through the reported BMFF,  
639 which permits group comparison and method cross-validation. Furthermore, dual-  
640 echo Dixon-derived BMFF allows the derivation of consistent 3D BMFF measurements  
641 across all UKBB MR imaging centres. This is very important for our BMFF validation  
642 study, as it allowed us to assess and automate extraction of BMFF maps from multiple  
643 skeletal sites, on a 3D mode.

644

#### 645 **4.5. Conclusions**

646 Our new deep learning models allow accurate segmentation of small VOIs from large  
647 volumetric MRI data. While we have used these models to analyse small BM regions,  
648 they could also be applied for precise, automated, large-scale analysis of other small  
649 anatomical structures of interest. The development and validation of our models using  
650 UKBB MRI data is hugely significant because, unlike most other MRI datasets, the  
651 UKBB also provides extensive genetic and phenotypic data for each subject, including

652 whole-genome sequencing and health records. This linked data allows comprehensive  
653 association studies to identify the genetic and pathophysiological factors associated  
654 with FF and other MRI-derived measurements. Indeed, Liu *et al*/ recently demonstrated  
655 the power of this approach using deep learning for segmentation of abdominal organs  
656 from UKBB MRI data (16). They identified genetic variants and clinical conditions  
657 associated with FF and other imaging-derived characteristics for each organ, as well  
658 as combinations of characteristics across multiple organs. The deep learning models  
659 established in the present study unlock similar possibilities: using these new models,  
660 we will next measure BMFF across the full UKBB imaging cohort, which will eventually  
661 include 100,000 subjects. This will allow us to identify the genetic, physiological and  
662 clinical conditions associated with altered BMFF at each site. Such knowledge will help  
663 to elucidate the mechanisms that influence BM adiposity and reveal, to an  
664 unprecedented extent, how BMAT impacts human health and disease.



665 **ACKNOWLEDGEMENTS**

666

667 This work was supported by a grant from the Medical Research Council  
668 (MR/S010505/1 to W.P.C.). W.P.C. was further supported by a Chancellor's  
669 Fellowship from the University of Edinburgh. C.W. was further supported by the British  
670 Heart Foundation (RG/16/10/32375). C.G. and T.M. were supported by the Edinburgh  
671 Clinical Research Facility and NHS Lothian R&D.

672

673 We are grateful to Dominic Job (Edinburgh Imaging, University of Edinburgh) for  
674 support with IT infrastructure, and Jimmy Bell, Louise Thomas and Brandon Witcher  
675 (University of Westminster) for helpful discussions and advice regarding working with  
676 UKBB MRI data.

677 **AUTHOR CONTRIBUTIONS** (based on [CRediT taxonomy](#))

678

679 **Conceptualisation**, W.P.C.; **Data curation**, D.M.M., C.W., G.P. and W.P.C.; **Formal**  
680 **Analysis**, D.M.M., C.W., G.P., C.D.G. and W.P.C.; **Funding Acquisition**, , S.I.K.S.,  
681 T.M. and W.P.C.; **Investigation**, D.M.M., C.W., G.P. and W.P.C.; **Methodology**,  
682 D.M.M., C.W., G.P., C.D.G., S.B., J.P., S.I.K.S., T.M. and W.P.C.; **Project**  
683 **administration**, S.I.K.S., T.M. and W.P.C.; **Resources**, S.I.K.S., T.M. and W.P.C.;  
684 **Software**, D.M.M., C.W., G.P.; **Supervision**, S.I.K.S., T.M. and W.P.C.;  
685 **Visualisation**, D.M.M., C.W., C.D.G. and W.P.C.; **Writing – Original Draft**, D.M.M.,  
686 C.W., S.B., J.P. and W.P.C.; **Writing – Review & Editing**, D.M.M., C.W., G.P.,  
687 C.D.G., S.B., J.P., S.I.K.S., T.M. and W.P.C.

688 **REFERENCES**

- 689 1. Cawthorn WP. Bone Marrow Adipose Tissue. In: Zaidi M, ed. Encyclopedia of  
690 Bone Biology. Oxford, UK: Oxford: Academic Press; 2020:156-77.
- 691 2. Devlin MJ, Cloutier AM, Thomas NA, et al. Caloric restriction leads to high marrow  
692 adiposity and low bone mass in growing mice. *J Bone Miner Res.*  
693 2010;25(9):2078-88.
- 694 3. Cawthorn WP, Scheller EL, Learman BS, et al. Bone Marrow Adipose Tissue Is  
695 an Endocrine Organ that Contributes to Increased Circulating Adiponectin during  
696 Caloric Restriction. *Cell Metabolism.* 2014;20(2):368-75.
- 697 4. Cawthorn WP, Scheller EL, Parlee SD, et al. Expansion of Bone Marrow Adipose  
698 Tissue During Caloric Restriction Is Associated With Increased Circulating  
699 Glucocorticoids and Not With Hypoleptinemia. *Endocrinology.* 2016;157(2):508-  
700 21.
- 701 5. Suchacki KJ, Tavares AAS, Mattiucci D, et al. Bone marrow adipose tissue is a  
702 unique adipose subtype with distinct roles in glucose homeostasis. *Nature*  
703 *Communications.* 2020;11(1):3097.
- 704 6. Veldhuis-Vlug AG, Rosen CJ. Clinical implications of bone marrow adiposity. *J*  
705 *Intern Med.* 2018;283(2):121-39.
- 706 7. Craft CS, Li Z, MacDougald OA, Scheller EL. Molecular differences between  
707 subtypes of bone marrow adipocytes. *Current Molecular Biology Reports.*  
708 2018;4(1):16-23.
- 709 8. Scheller EL, Doucette CR, Learman BS, et al. Region-specific variation in the  
710 properties of skeletal adipocytes reveals regulated and constitutive marrow  
711 adipose tissues. *Nat Commun.* 2015;6:7808.
- 712 9. Tratwal J, Labella R, Bravenboer N, et al. Reporting Guidelines, Review of  
713 Methodological Standards, and Challenges Toward Harmonization in Bone  
714 Marrow Adiposity Research. Report of the Methodologies Working Group of the  
715 International Bone Marrow Adiposity Society. *Frontiers in Endocrinology.*  
716 2020;11(65).
- 717 10. Karampinos DC, Ruschke S, Dieckmeyer M, et al. Quantitative MRI and  
718 spectroscopy of bone marrow. *J Magn Reson Imaging.* 2018;47(2):332-53.
- 719 11. Cordes C, Baum T, Dieckmeyer M, et al. MR-Based Assessment of Bone Marrow  
720 Fat in Osteoporosis, Diabetes, and Obesity. *Front Endocrinol (Lausanne).*  
721 2016;7:74.
- 722 12. Sollmann N, Löffler MT, Kronthaler S, et al. MRI-Based Quantitative Osteoporosis  
723 Imaging at the Spine and Femur. *Journal of Magnetic Resonance Imaging.*  
724 2021;54(1):12-35.
- 725 13. Shen W, Chen J, Gantz M, et al. MRI-measured pelvic bone marrow adipose  
726 tissue is inversely related to DXA-measured bone mineral in younger and older  
727 adults. *European journal of clinical nutrition.* 2012;66(9):983-8.
- 728 14. Littlejohns TJ, Holliday J, Gibson LM, et al. The UK Biobank imaging enhancement  
729 of 100,000 participants: rationale, data collection, management and future  
730 directions. *Nature Communications.* 2020;11(1):2624.
- 731 15. Kart T, Fischer M, Küstner T, et al. Deep Learning-Based Automated Abdominal  
732 Organ Segmentation in the UK Biobank and German National Cohort Magnetic  
733 Resonance Imaging Studies. *Invest Radiol.* 2021;56(6):401-8.
- 734 16. Liu Y, Bastý N, Whitcher B, et al. Genetic architecture of 11 organ traits derived  
735 from abdominal MRI using deep learning. *eLife.* 2021;10:e65554.

- 736 17. Suinesiaputra A, Sanghvi MM, Aung N, et al. Fully-automated left ventricular mass  
737 and volume MRI analysis in the UK Biobank population cohort: evaluation of initial  
738 results. *Int J Cardiovasc Imaging*. 2018;34(2):281-91.
- 739 18. Zhou J, Damasceno PF, Chachad R, et al. Automatic Vertebral Body  
740 Segmentation Based on Deep Learning of Dixon Images for Bone Marrow Fat  
741 Fraction Quantification. *Frontiers in Endocrinology*. 2020;11(612).
- 742 19. Zhao Y, Zhao T, Chen S, et al. Fully automated radiomic screening pipeline for  
743 osteoporosis and abnormal bone density with a deep learning-based  
744 segmentation using a short lumbar mDixon sequence. *Quantitative Imaging in  
745 Medicine and Surgery*. 2022;12(2):1198-213.
- 746 20. von Brandis E, Jenssen HB, Avenarius DFM, et al. Automated segmentation of  
747 magnetic resonance bone marrow signal: a feasibility study. *Pediatric Radiology*.  
748 2022;52(6):1104-14.
- 749 21. Gondim Teixeira PA, Cherubin T, Badr S, et al. Proximal femur fat fraction  
750 variation in healthy subjects using chemical shift-encoding based MRI. *Sci Rep*.  
751 2019;9(1):20212.
- 752 22. Çiçek Ö, Abdulkadir A, Lienkamp SS, et al. 3D U-Net: Learning Dense Volumetric  
753 Segmentation from Sparse Annotation. 2016. Cham. Springer International  
754 Publishing: 424-32.
- 755 23. Ronneberger O, Fischer P, Brox T. U-Net: Convolutional Networks for Biomedical  
756 Image Segmentation. 2015. Cham. Springer International Publishing: 234-41.
- 757 24. Woo S, Park J, Lee J-Y, Kweon IS. CBAM: Convolutional Block Attention Module.  
758 2018. Cham. Springer International Publishing: 3-19.
- 759 25. Wang X, Girshick RB, Gupta A, He K. Non-local Neural Networks. 2018 IEEE/CVF  
760 Conference on Computer Vision and Pattern Recognition. 2018:7794-803.
- 761 26. Paszke A, Gross S, Chintala S, et al. Automatic differentiation in PyTorch. 2017.
- 762 27. Kingma DP, Ba J. Adam: A Method for Stochastic Optimization. *CoRR*.  
763 2015;abs/1412.6980.
- 764 28. finalfit: Quickly Create Elegant Regression Results Tables and Plots when  
765 Modelling [computer program]. Version R package version 1.0.5; 2022.
- 766 29. Griffith JF, Yeung DK, Ma HT, et al. Bone marrow fat content in the elderly: a  
767 reversal of sex difference seen in younger subjects. *J Magn Reson Imaging*.  
768 2012;36(1):225-30.
- 769 30. Baum T, Rohrmeier A, Syväri J, et al. Anatomical Variation of Age-Related  
770 Changes in Vertebral Bone Marrow Composition Using Chemical Shift Encoding-  
771 Based Water–Fat Magnetic Resonance Imaging. *Frontiers in Endocrinology*.  
772 2018;9:141.
- 773 31. Slade JM, Coe LM, Meyer RA, McCabe LR. Human bone marrow adiposity is  
774 linked with serum lipid levels not T1-diabetes. *Journal of diabetes and its  
775 complications*. 2012;26(1):1-9.
- 776 32. Hasic D, Lorbeer R, Bertheau RC, et al. Vertebral Bone Marrow Fat Is  
777 independently Associated to VAT but Not to SAT: KORA FF4—Whole-Body MR  
778 Imaging in a Population-Based Cohort. *Nutrients*. 2020;12(5):1527.
- 779 33. Bredella MA, Torriani M, Ghomi RH, et al. Vertebral Bone Marrow Fat Is Positively  
780 Associated With Visceral Fat and Inversely Associated With IGF-1 in Obese  
781 Women. *Obesity (Silver Spring)*. 2011.
- 782 34. Griffith JF, Yeung DK, Tsang PH, et al. Compromised bone marrow perfusion in  
783 osteoporosis. *J Bone Miner Res*. 2008;23(7):1068-75.
- 784 35. Bredella MA, Fazeli PK, Miller KK, et al. Increased bone marrow fat in anorexia  
785 nervosa. *J Clin Endocrinol Metab*. 2009;94(6):2129-36.

- 786 36. Liu CY, McKenzie CA, Yu H, et al. Fat quantification with IDEAL gradient echo  
787 imaging: correction of bias from T(1) and noise. Magn Reson Med.  
788 2007;58(2):354-64.

789 **TABLES**  
790

|                                  | Males (n = 277)    |                       |                       | F (n = 452)            |                        |                       |
|----------------------------------|--------------------|-----------------------|-----------------------|------------------------|------------------------|-----------------------|
|                                  | Control (n=138)    | Osteopaenic (n=146)   | Osteoporotic (n=17)   | Control (n=134)        | Osteopaenic (n=262)    | Osteoporotic (n=70)   |
| Age (years)                      | 65 [63, 67]        | 65 [63, 67]           | 64.47 ± 0.7           | 65 [62, 67]            | 65 [62, 67]            | 65 [63, 67]           |
| BMI (kg/m <sup>2</sup> )         | 23.6 [22.8, 24.3]  | 23.3 [22.3, 24.1]     | 22.04 ± 0.20 ***      | 22.9 [21.7, 23.9] ##   | 22.6 [21.3, 23.7]      | 21.67 ± 0.40 *        |
| BMD T-score (L1-L4)              | 0.65 [-0.2, 1.775] | -1 [-1.575, -0.1] *** | -3 [-3.25, -1.55] *** | 0.15 [-0.4, 0.9]       | -1.5 [-1.9, -0.8] ***  | -2.8 [-3.1, -2.6] *** |
| BMD T-score (total femur, left)  | 0.2 [-0.3, 0.7]    | -1.12 ± 0.05 ***      | -2.2 ± 0.14 ***       | 0 [-0.4, 0.475]        | -1.4 [-1.8, -1] ***    | -2.22 ± 0.09 ***      |
| BMD T-score (femoral neck, left) | -0.3 [-0.7, 0.275] | -1.5 [-1.8, -1.2] *** | -2.45 ± 0.13 ***      | -0.15 [-0.7, 0.4]      | -1.45 [-1.8, -1.1] *** | -2.11 ± 0.07 ***      |
| Android tissue fat % by DXA      | 30.6 [24, 34.6]    | 30.0 [22.8, 35.7]     | 24.4 ± 2.0            | 34.8 [27.8, 40.7] ###  | 32.5 ± 0.6             | 31.0 ± 1.1            |
| Gynoid tissue fat % by DXA       | 24.3 ± 0.4         | 24.4 ± 0.4            | 23.5 ± 1.0            | 37.6 ± 0.4 ###         | 38.5 ± 0.3             | 38.7 ± 0.6            |
| Legs tissue fat % by DXA         | 20.9 ± 0.3         | 21.2 ± 0.3            | 21.3 ± 1.0            | 35.2 ± 0.5 ###         | 36.9 ± 0.3             | 37.1 ± 0.6            |
| Trunk tissue fat % by DXA        | 29.1 [23.7, 32.0]  | 28.6 [23.0, 33.4]     | 24.3 ± 1.5            | 35.4 [29.9, 39.5] ###  | 33.3 ± 0.4             | 32.3 ± 0.9            |
| Total tissue fat % by DXA        | 24.6 ± 0.4         | 25.6 [21.6, 28.5]     | 22.9 ± 1.8            | 34.7 [30.9, 37.38] ### | 34.3 ± 0.3             | 33.9 ± 0.6            |
| VAT mass (g)                     | 949.4 ± 35.25      | 783.5 [465.5, 1131]   | 586 ± 79.6 **         | 407 [225.5, 717] ###   | 346.5 [217, 563.5]     | 296 [193.3, 526.5]    |

791  
792 **Table 1 – Characteristics of subjects in training and validation cohort.** Normally  
793 distributed data are reported as mean ± SEM while non-normally distributed data are  
794 reported as median [interquartile range]. BMI, body mass index; DXA, dual-energy X-  
795 ray absorptiometry; VAT, visceral adipose tissue. Within each sex, significant  
796 differences between control subjects and osteopaenic or osteoporotic subjects are  
797 indicated by \* (*P* <0.05), \*\* (*P* <0.01) or \*\*\* (*P* <0.001). Within control subjects,  
798 significant differences between males and females are indicated by ## (*P* <0.01) or ###  
799 (*P* <0.001).

|                            | <b>Vertebrae</b> | <b>Femoral head</b> | <b>Total Hip</b> | <b>Femoral Diaphysis</b> |
|----------------------------|------------------|---------------------|------------------|--------------------------|
| <b>U-Net</b>               | 0.925            | 0.951               | 0.904            | 0.69                     |
| <b>ROI-Attention-U-Net</b> | 0.912            | 0.945               | 0.912            | 0.866                    |

800

801

802

**Table 2** – Segmentation Accuracy (dice scores) of the traditional U-Net and our CBAM-ROI-attention U-Net.

| Explanatory       | Dependent         | Sex                         | $\beta$ (CIs)               | Adj. R <sup>2</sup> | P (Exp)          | P (Exp*Sex)    |
|-------------------|-------------------|-----------------------------|-----------------------------|---------------------|------------------|----------------|
| BMFF Spine        | BMFF Femoral Head | Both                        | <b>0.037 (0.015, 0.059)</b> | <b>0.015</b>        | <b>1.25E-03</b>  | <b>2.6E-04</b> |
|                   |                   | Female                      | <b>0.109 (0.08, 0.138)</b>  | <b>0.118</b>        | <b>8.69E-13</b>  | -              |
|                   |                   | Male                        | 0.028 (0, 0.057)            | 0.013               | 0.049            | -              |
|                   | BMFF Total Hip    | Both                        | <b>0.091 (0.063, 0.12)</b>  | <b>0.055</b>        | <b>4.48E-10</b>  | <b>0.026</b>   |
|                   |                   | Female                      | <b>0.171 (0.132, 0.21)</b>  | <b>0.145</b>        | <b>2.16E-16</b>  | -              |
|                   | Male              | <b>0.106 (0.069, 0.144)</b> | <b>0.107</b>                | <b>7.22E-08</b>     | -                |                |
| BMFF Diaphysis    | Both              | 0.054 (0.01, 0.099)         | 0.007                       | 0.017               | 0.801            |                |
| BMFF Femoral Head | BMFF Total Hip    | Both                        | <b>1.011 (0.939, 1.082)</b> | <b>0.552</b>        | <b>1.18E-111</b> | 0.474          |
|                   | BMFF Diaphysis    | Both                        | <b>0.818 (0.674, 0.962)</b> | <b>0.169</b>        | <b>1.69E-26</b>  | 0.534          |
| BMFF Total Hip    | BMFF Diaphysis    | Both                        | <b>0.764 (0.669, 0.858)</b> | <b>0.281</b>        | <b>2.48E-48</b>  | <b>0.001</b>   |
|                   |                   | Female                      | <b>0.65 (0.534, 0.766)</b>  | <b>0.228</b>        | <b>8.76E-25</b>  | -              |
|                   |                   | Male                        | <b>1.046 (0.857, 1.234)</b> | <b>0.331</b>        | <b>1.03E-22</b>  | -              |

803 **Table 3 – Univariable and sex-stratified associations between BMFF for each**  
804 **region.** To test if the explanatory-dependent relationship differs between males and  
805 F, a linear model was first analysed across both sexes, with sex included as an  
806 interacting variable. Beta coefficients are shown (with lower and upper 95% CIs in  
807 brackets), followed by the adjusted R<sup>2</sup> (Adj. R<sup>2</sup>) and unadjusted P value for each  
808 explanatory variable (P Exp). P values were also calculated for the Explanatory\*Sex  
809 interaction (P Exp\*Sex); if significant, additional linear models were analysed in  
810 females and males separately. Because 12 correlations were assessed, the  
811 Bonferroni-adjusted alpha level for P (Exp) is 0.05/12 = 0.0042. Significant  
812 explanatory-dependent relationships are highlighted in bold.



|           | <i>Covariable</i>   |        |                                     |                                  |                                |                                   |                                |                                |
|-----------|---------------------|--------|-------------------------------------|----------------------------------|--------------------------------|-----------------------------------|--------------------------------|--------------------------------|
|           | Adj. R <sup>2</sup> | AIC    | BMFF Spine                          | Sex (M)                          | BMI                            | Legs fat %                        | VAT mass (kg)                  | Android fat %                  |
| Model 4.1 | 0.39                | -893.1 | <b>-0.004 (-0.006 to -0.003)***</b> | <b>0.177 (0.156 to 0.198)***</b> | -                              | -                                 | -                              | -                              |
| Model 4.2 | 0.43                | -941.9 | <b>-0.005 (-0.006, -0.003)***</b>   | <b>0.158 (0.137, 0.179)***</b>   | <b>0.023 (0.017, 0.030)***</b> | -                                 | -                              | -                              |
| Model 4.3 | 0.46                | -975.3 | <b>-0.004 (-0.006, -0.003)***</b>   | <b>0.061 (0.023, 0.098)**</b>    | <b>0.029 (0.023, 0.036)***</b> | <b>-0.006 (-0.008, -0.004)***</b> | -                              | -                              |
| Model 4.4 | 0.47                | -990.7 | <b>-0.005 (-0.006, -0.004)***</b>   | 0.037 (-0.002, 0.075)            | <b>0.022 (0.015, 0.029)***</b> | <b>-0.006 (-0.008, -0.004)***</b> | <b>0.064 (0.033, 0.095)***</b> | -                              |
| Model 4.5 | 0.47                | -990.1 | <b>-0.005 (-0.006, -0.004)***</b>   | <b>0.058 (0.020, 0.095)**</b>    | <b>0.021 (0.014, 0.029)***</b> | <b>-0.007 (-0.009, -0.005)***</b> | -                              | <b>0.003 (0.001, 0.004)***</b> |
| Model 4.6 | 0.47                | -990.9 | <b>-0.005 (-0.007, -0.004)***</b>   | <b>0.043 (0.004, 0.083)*</b>     | <b>0.021 (0.013, 0.028)***</b> | <b>-0.007 (-0.009, -0.004)***</b> | 0.041 (-0.003, 0.085)          | 0.001 (-0.000, 0.003)          |

813 **Table 4 – Multivariable regression analyses for spine BMD.** Multivariable  
814 regression was done using BMD spine as the dependent variable; explanatory  
815 variables were selected based on those showing significant univariable association  
816 with BMD spine and/or BMFF at the relevant sites, as shown in Supplemental Tables  
817 1-5. For each model the adjusted R<sup>2</sup> (Adj. R<sup>2</sup>) and Akaike Information Criterion (AIC)  
818 are shown, along with multivariable beta coefficients (with lower and upper 95% CIs)  
819 for each variable. *P* values are indicated by \* (*P*<0.05), \*\* (*P*<0.01) or \*\*\* (*P*<0.001),  
820 with significant associations highlighted in bold

|                   | <b>Covariable</b>         |            |                                   |                                   |                                   |                                |                                |                                   |                                 |                              |
|-------------------|---------------------------|------------|-----------------------------------|-----------------------------------|-----------------------------------|--------------------------------|--------------------------------|-----------------------------------|---------------------------------|------------------------------|
|                   | <b>Adj. R<sup>2</sup></b> | <b>AIC</b> | <b>BMFF Femoral Head</b>          | <b>BMFF Total Hip</b>             | <b>BMFF Spine</b>                 | <b>Sex (M)</b>                 | <b>BMI</b>                     | <b>Legs fat %</b>                 | <b>Android fat %</b>            | <b>Trunk fat %</b>           |
| <b>Model 5.1</b>  | 0.11                      | -658.8     | <b>-0.011 (-0.015, -0.008)***</b> | -                                 | -                                 | -                              | -                              | -                                 | -                               | -                            |
| <b>Model 5.2</b>  | 0.12                      | -662.2     | <b>-0.011 (-0.014, -0.008)***</b> | -                                 | -                                 | -                              | <b>0.008 (0.001, 0.015)*</b>   | -                                 | -                               | -                            |
| <b>Model 5.3</b>  | 0.13                      | -669.9     | <b>-0.011 (-0.014, -0.007)***</b> | -                                 | -                                 | -                              | <b>0.012 (0.005, 0.019)**</b>  | <b>-0.003 (-0.006, -0.001)**</b>  | -                               | -                            |
| <b>Model 5.4</b>  | 0.24                      | -1083.6    | -                                 | <b>-0.015 (-0.018, -0.012)***</b> | -                                 | <b>0.122 (0.104, 0.140)***</b> | -                              | -                                 | -                               | -                            |
| <b>Model 5.5</b>  | 0.25                      | -1093.3    | -                                 | <b>-0.014 (-0.017, -0.011)***</b> | -                                 | <b>0.114 (0.096, 0.132)***</b> | <b>0.010 (0.004, 0.016)**</b>  | -                                 | -                               | -                            |
| <b>Model 5.6</b>  | 0.27                      | -1104.8    | -                                 | <b>-0.013 (-0.016, -0.010)***</b> | -                                 | <b>0.057 (0.022, 0.092)**</b>  | <b>0.014 (0.008, 0.020)**</b>  | <b>-0.003 (-0.005, -0.002)***</b> | -                               | -                            |
| <b>Model 5.7</b>  | 0.28                      | -1107.1    | -                                 | <b>-0.013 (-0.016, -0.010)***</b> | -                                 | <b>0.057 (0.022, 0.092)**</b>  | <b>0.017 (0.010, 0.024)***</b> | <b>-0.003 (-0.005, -0.001)**</b>  | <b>-0.001 (-0.002, -0.000)*</b> | -                            |
| <b>Model 5.8</b>  | 0.27                      | -1108.1    | -                                 | <b>-0.013 (-0.016, -0.010)***</b> | -                                 | <b>0.066 (0.030, 0.102)***</b> | <b>0.017 (0.010, 0.024)***</b> | <b>-0.004 (-0.006, -0.002)***</b> | <b>-0.007 (-0.014, -0.000)*</b> | 0.008 (-0.001, 0.017)        |
| <b>Model 5.9</b>  | 0.20                      | -1039.1    | -                                 | -                                 | <b>-0.004 (-0.006, -0.003)***</b> | <b>0.077 (0.059, 0.096)***</b> | -                              | -                                 | -                               | -                            |
| <b>Model 5.10</b> | 0.22                      | -1058.1    | -                                 | -                                 | <b>-0.005 (-0.006, -0.003)***</b> | <b>0.066 (0.047, 0.085)***</b> | <b>0.014 (0.008, 0.019)***</b> | -                                 | -                               | -                            |
| <b>Model 5.11</b> | 0.24                      | -1071.5    | -                                 | -                                 | <b>-0.004 (-0.006, -0.003)***</b> | 0.007 (-0.028, 0.042)          | <b>0.017 (0.011, 0.023)***</b> | <b>-0.004 (-0.006, -0.002)***</b> | -                               | -                            |
| <b>Model 5.12</b> | 0.29                      | -1089.6    | -                                 | <b>-0.011 (-0.014, -0.008)***</b> | <b>-0.003 (-0.004, -0.001)***</b> | <b>0.053 (0.016, 0.090)**</b>  | <b>0.015 (0.008, 0.022)***</b> | <b>-0.004 (-0.006, -0.002)***</b> | <b>-0.007 (-0.014, -0.001)*</b> | <b>0.009 (0.000, 0.018)*</b> |

822 **Table 5 – Multivariable regression analyses for femoral neck BMD.** Multivariable regression was done using femoral neck BMD  
823 as the dependent variable, with BMFF at the femoral head, total hip and spine chosen as the primary explanatory variables. Other  
824 explanatory covariables were selected, models constructed, and data presented as described for Table 4. Models with femoral head  
825 BMFF (5.1, 5.2 and 5.3) were tested in females only because univariable analysis showed that this is not associated total hip BMD  
826 in males (Supplemental Table 2).

827

|                  | <i>Covariable</i>   |         |                                   |                                |                                |                                   |                               |
|------------------|---------------------|---------|-----------------------------------|--------------------------------|--------------------------------|-----------------------------------|-------------------------------|
|                  | Adj. R <sup>2</sup> | AIC     | BMFF Total Hip                    | Sex (M)                        | BMI                            | Legs fat %                        | VAT mass (kg)                 |
| <b>Model 6.1</b> | 0.34                | -997.9  | <b>-0.017 (-0.020, -0.014)***</b> | <b>0.170 (0.152, 0.189)***</b> | -                              | -                                 | -                             |
| <b>Model 6.2</b> | 0.37                | -1029.2 | <b>-0.016 (-0.019, -0.013)***</b> | <b>0.156 (0.137, 0.175)***</b> | <b>0.018 (0.012, 0.023)***</b> | -                                 | -                             |
| <b>Model 6.3</b> | 0.39                | -1056.6 | <b>-0.015 (-0.018, -0.012)***</b> | <b>0.069 (0.033, 0.105)***</b> | <b>0.023 (0.017, 0.029)***</b> | <b>-0.005 (-0.007, -0.003)***</b> | -                             |
| <b>Model 6.4</b> | 0.39                | -1051.3 | <b>-0.015 (-0.018, -0.012)***</b> | <b>0.074 (0.037, 0.111)***</b> | <b>0.025 (0.018, 0.032)***</b> | <b>-0.005 (-0.007, -0.003)***</b> | <b>-0.016 (-0.045, 0.012)</b> |

828

829

830

831

832

833

**Table 6 – Multivariable regression analyses for total hip BMD.** Multivariable regression was done using total hip BMD as the dependent variable, with BMFF at the total hip as the primary explanatory variable. Other explanatory covariables were selected, models constructed, and data presented as described for Table 4.

|           | <i>Covariable</i>   |        |                                   |                                |                                |                                   |                        |                                 |                                 |
|-----------|---------------------|--------|-----------------------------------|--------------------------------|--------------------------------|-----------------------------------|------------------------|---------------------------------|---------------------------------|
|           | Adj. R <sup>2</sup> | AIC    | BMFF Diaphysis                    | Sex (M)                        | BMI                            | Legs fat %                        | VAT mass (kg)          | Android fat %                   | Trunk fat %                     |
| Model 7.1 | 0.28                | -693.2 | <b>-0.014 (-0.016, -0.011)***</b> | <b>0.164 (0.141, 0.187)***</b> | -                              | -                                 | -                      | -                               | -                               |
| Model 7.2 | 0.30                | -711.7 | <b>-0.013 (-0.016, -0.011)***</b> | <b>0.151 (0.127, 0.174)***</b> | <b>0.017 (0.010, 0.025)***</b> | -                                 | -                      | -                               | -                               |
| Model 7.3 | 0.33                | -743.1 | <b>-0.013 (-0.016, -0.011)***</b> | 0.035 (-0.010, 0.080)          | <b>0.025 (0.017, 0.032)***</b> | <b>-0.007 (-0.010, -0.005)***</b> | -                      | -                               | -                               |
| Model 7.4 | 0.33                | -739.5 | <b>-0.013 (-0.016, -0.011)***</b> | 0.045 (-0.002, 0.091)          | <b>0.028 (0.019, 0.037)***</b> | <b>-0.007 (-0.010, -0.005)***</b> | -0.029 (-0.065, 0.007) | -                               | -                               |
| Model 7.5 | 0.34                | -747.1 | <b>-0.014 (-0.016, -0.011)***</b> | 0.038 (-0.007, 0.083)          | <b>0.030 (0.021, 0.039)***</b> | <b>-0.006 (-0.009, -0.004)***</b> | -                      | <b>-0.002 (-0.004, -0.000)*</b> | -                               |
| Model 7.6 | 0.34                | -745.3 | <b>-0.013 (-0.016, -0.011)***</b> | 0.035 (-0.010, 0.080)          | <b>0.030 (0.021, 0.039)***</b> | <b>-0.006 (-0.009, -0.004)***</b> | -                      | -                               | <b>-0.002 (-0.004, -0.000)*</b> |
| Model 7.7 | 0.34                | -743.4 | <b>-0.014 (-0.016, -0.011)***</b> | 0.047 (-0.002, 0.096)          | <b>0.030 (0.020, 0.039)***</b> | -0.008 (-0.011, -0.005)***        | 0.007 (-0.044, 0.059)  | <b>-0.011 (-0.020, -0.002)*</b> | <b>0.012 (0.000, 0.024)*</b>    |

834 **Table 7 – Multivariable regression analyses for femoral shaft BMD.** Multivariable regression was done using femoral shaft BMD  
835 as the dependent variable; explanatory covariables were selected, models constructed, and data presented as described for Table  
836 4.

837

## 838 **FIGURE LEGENDS**

839

840 **Figure 1 – Workflow for data management, manual segmentation and**  
841 **application and validation of deep learning.** The test dataset comprised the  
842 validation cohort of 729 subjects (described in Table 1), from which datasets from 75  
843 subjects were manually segmented (A) to generate four VOIs per subject (spine,  
844 femoral head, total hip, and femoral diaphysis). The manual segmentations from 61-  
845 64 of these subjects were used to train the deep learning models for each VOI (B),  
846 while those from 10-12 subjects were kept as ‘unseen’ segmentations that had not  
847 been used to train the models (C). The models were then used to segment all datasets  
848 from the 729-subject cohort (D), with deep learning segmentations from the 10-  
849 152 validation datasets then compared to the corresponding manual segmentations to  
850 calculate dice coefficients for each model (E). Finally, FF maps were generated from  
851 each MRI dataset (F) and the deep learning segmentations applied to these to obtain  
852 the BMFF for each VOI (G).

853

854 **Figure 2 – Architecture of our CBAM Attention ROI U-Net for segmenting small**  
855 **structures from large 3D data.** Each convolutional block in the U-Net encoding  
856 subnetwork (or contracting path) includes one or two CBAM (convolutional block  
857 attention module) layers. A fixed-size single channel spatial attention map is generated  
858 by each CBAM layer through 1X1X1 convolutions and trilinear interpolation. These  
859 attention maps are then combined to produce a probability map of object location with  
860 which a ROI is defined. The encoded features of all resolution-levels are then cropped  
861 to the ROI and input into the decoder which produces the segmentation results within  
862 the detected ROI. A non-local spatial attention layer is inserted in the final block to  
863 generate globally sensitive features. The final segmentation results are then generated  
864 by implanting the ROI back into the whole data volume.

865

866 **Figure 3 – Visual comparison of manual vs deep learning segmentations.** Deep  
867 learning segmentation results (purple) are displayed on top of the ground-truth  
868 (manual) segmentations (yellow). Representative images from the axial, coronal and  
869 sagittal plane are shown, along with a 3D rendering.

870

871 **Figure 4 – Sex differences in BMFF vary according to skeletal region.** BMFF for  
872 control subjects was assessed at each skeletal region. Data represent 134 females  
873 and 138 males and are shown as violin plots overlaid with individual data points.  
874 Significant effects of region, sex, and region\*sex interaction were assessed using a  
875 mixed-effects model with Šídák’s multiple comparisons test. Overall *P* values for  
876 each variable, and their interaction, are shown in the box, while significant sex  
877 differences within each region are indicated above.

878

879 **Figure 5 – Osteopaenia or osteoporosis influence BMFF in a sex- and region-**  
880 **specific manner.** BMFF for control, osteopaenic and osteoporotic subjects was  
881 assessed at each skeletal region. Data are shown as violin plots overlaid with  
882 individual data points. Within each sex, significant differences between control and  
883 osteopaenic or osteoporotic subjects were assessed by one-way ANOVA (for normally  
884 distributed data: A) or the Kruskal-Wallis test (for non-normally distributed data: B-D).  
885 *P* values for each comparison are shown on each graph.

**Figure 1**

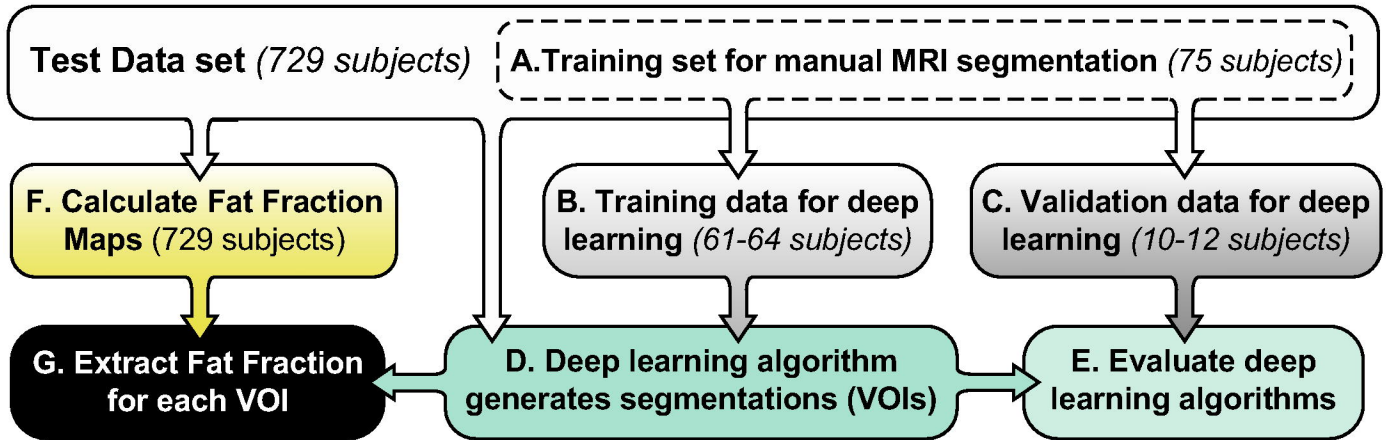

Figure 2

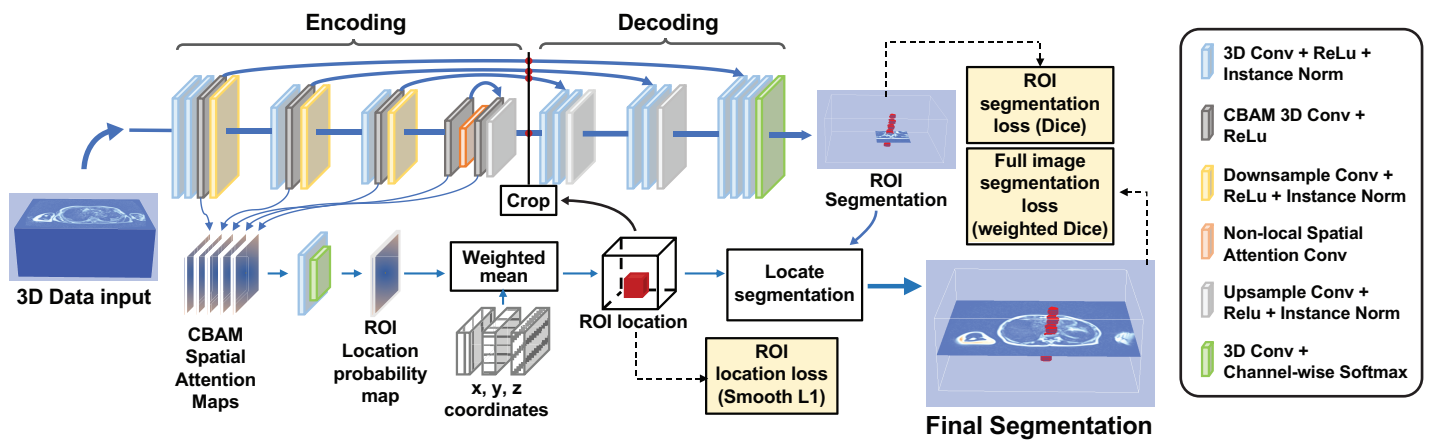



**Figure 3**

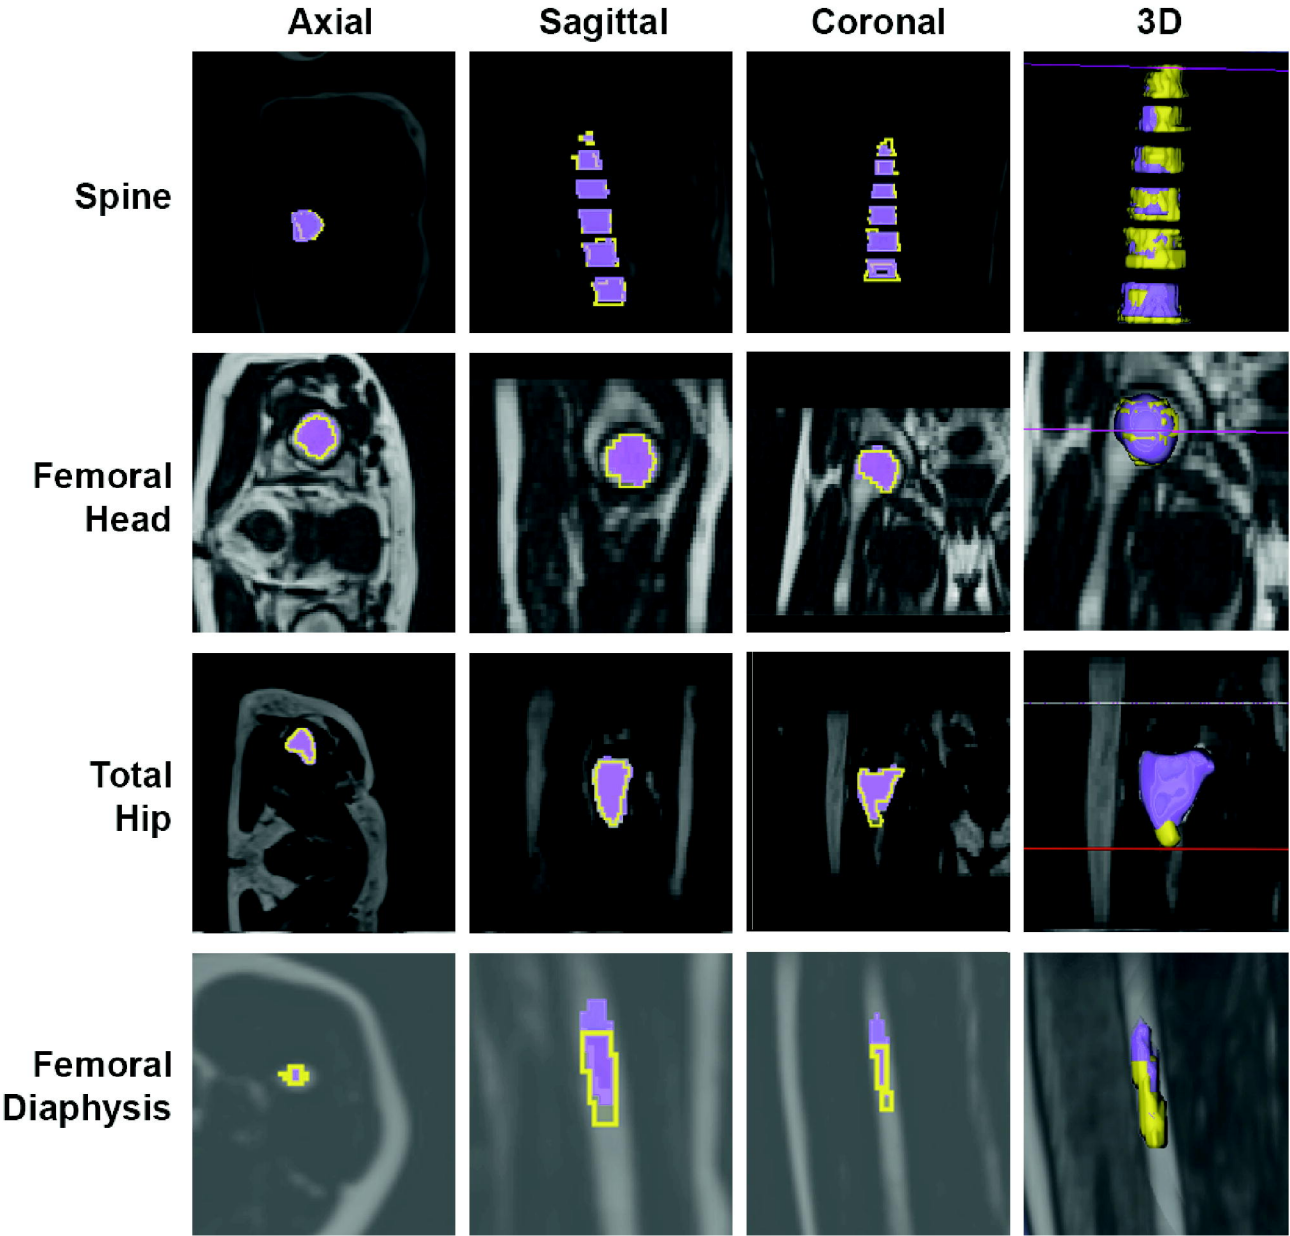

Figure 4

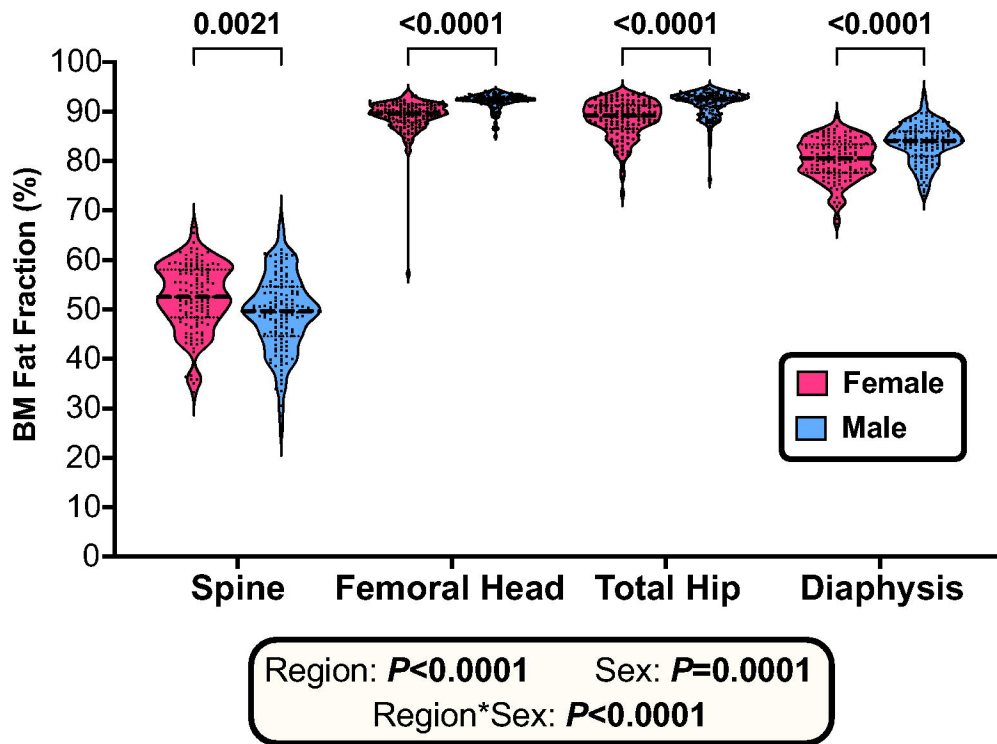

**Figure 5**

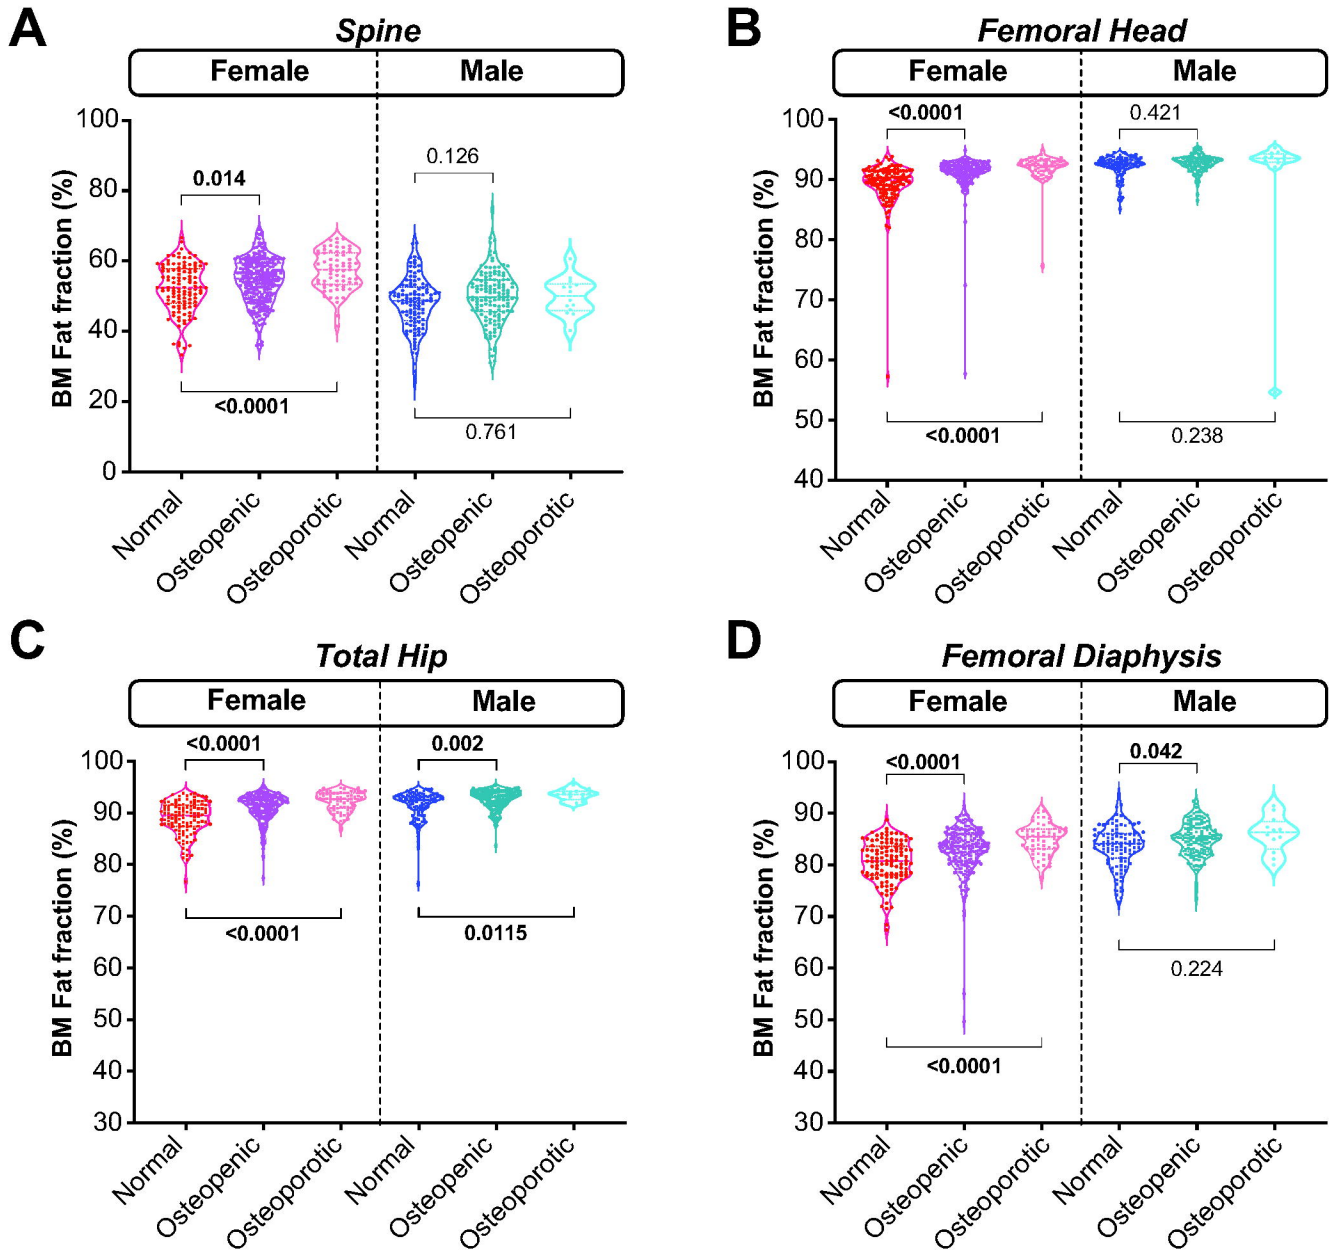

Source: https://www.medrxiv.org/content/10.1101/2022.12.06.22283151v1.full.pdf
